# Supplementary material for: Ecosystem Services and Biodiversity in a Rapidly Transforming Landscape in Northern Borneo
Source: PLoS One. 2015 Oct 14;10(10):e0140423. doi: 10.1371/journal.pone.0140423 (PMC4605616; doi:10.1371/journal.pone.0140423)
Supplement: S1 Table — No vegetation plot was selected in food crop fields under the assumption that tree diversity and aboveground carbon would be null. The first plot size dimension is the dimension along the slope. (XLSX) [file pone.0140423.s002.xlsx]

## Sheet: sampling design
	Vegetation plots			Erosion plots
Land-use type	Plot size (m)	Nb of plots *	Total surveyed area (ha)	Plot size (m)	Nb of plots
food crop field	–	–	–	15 × 4	5
young secondary regrowth	20 × 20	12	0.48	15 × 4	5
old secondary regrowth	20 × 20	12	0.48	15 × 4	5
young rubber garden	20 × 20	12	0.48	15 × 4	5
old rubber garden	20 × 20	12	0.48	15 × 4	5
logged-over forest	20 × 100	5 (25)	1	15 × 4	5
natural forest	20 × 100	5 (25)	1	15 × 4	5
Total	–	58 (98)	3.92	–	35
* Values in parentheses show the number of corresponding 20 × 20 m plots after 20 × 100 m rectangular plots were resampled for comparison purposes.
