# Supplementary material for: Ecosystem Services and Biodiversity in a Rapidly Transforming Landscape in Northern Borneo
Source: PLoS One. 2015 Oct 14;10(10):e0140423. doi: 10.1371/journal.pone.0140423 (PMC4605616; doi:10.1371/journal.pone.0140423)
Supplement: S2 Table — Longitude and latitude of each plot are provided in decimal degrees (WSG84 datum). Plot mean diameter at breast height (DBH), height, wood specific gravity (WSG) and aboveground carbon (AGC) are also provided. (XLSX) [file pone.0140423.s003.xlsx]

## Sheet: vegetation plot features
Plot ID	Land-use type	Time since last disturbance	Latitude	Longitude	Nb trees	DBH (cm)	Height (m)	WSG (g cm-3)	AGC (Mg ha-1)	Species richness	Fisher's α	Berger-Parker index	Nb critically endangered species	Nb threatened species
VS_YsR_1	young secondary regrowth	7	1.16283	112.259	45	6	6.4	0.511	3.9	6	1.86	3	0	0
VS_YsR_2	young secondary regrowth	7	1.16329	112.259	75	6	6.7	0.494	6.8	8	2.27	3.57	0	0
VS_YsR_3	young secondary regrowth	10	1.15325	112.264	74	9.1	8.9	0.479	24	16	6.28	2.47	0	0
VS_YsR_4	young secondary regrowth	18	1.15075	112.263	41	11.5	7.8	0.474	29.9	18	12.25	2.93	0	0
VS_YsR_5	young secondary regrowth	10	1.15341	112.264	70	8.8	8	0.442	29.2	10	3.19	2	0	0
VS_YsR_6	young secondary regrowth	8	1.15722	112.265	75	10.8	9.9	0.387	25.4	16	6.23	2.14	0	0
VS_YsR_7	young secondary regrowth	8	1.15727	112.265	84	9.5	9	0.407	21	15	5.32	2.71	0	0
VS_YsR_8	young secondary regrowth	20	1.14972	112.263	55	11.8	8.4	0.489	68.4	13	5.37	3.93	0	0
VS_YsR_9	young secondary regrowth	20	1.14936	112.262	50	12	9.3	0.577	35.8	23	16.5	6.25	0	0
VS_YsR_10	young secondary regrowth	5	1.15651	112.264	123	7.5	7.6	0.461	19	22	7.8	2.62	0	0
VS_YsR_11	young secondary regrowth	10	1.15728	112.264	51	7.3	7.7	0.483	8.3	14	6.37	2.32	0	0
VS_YsR_12	young secondary regrowth	20	1.15926	112.264	61	10.1	10	0.52	37.6	20	10.37	3.39	0	0
VS_OsR_1	old secondary regrowth	30	1.14951	112.257	50	9.8	8.5	0.499	18.8	22	15.01	4.17	0	0
VS_OsR_2	old secondary regrowth	45	1.14887	112.255	45	15	10.3	0.55	107.2	30	39.33	11.25	0	0
VS_OsR_3	old secondary regrowth	50	1.14919	112.254	55	9.2	9.8	0.572	28	28	22.83	11	0	0
VS_OsR_4	old secondary regrowth	70	1.14983	112.258	35	17.3	10.8	0.597	118.8	17	13.03	5.83	0	0
VS_OsR_5	old secondary regrowth	70	1.14926	112.257	45	13.4	10.2	0.562	79.1	32	49.45	6.43	0	0
VS_OsR_6	old secondary regrowth	38	1.15884	112.265	59	12.9	10.7	0.468	42	14	5.8	1.51	0	0
VS_OsR_7	old secondary regrowth	60	1.16263	112.266	49	16.6	9.6	0.588	96	27	24.7	8.17	0	0
VS_OsR_8	old secondary regrowth	40	1.15238	112.267	52	12.5	9.5	0.574	41.9	24	17.29	5.78	0	0
VS_OsR_9	old secondary regrowth	38	1.1506	112.264	49	16.3	11.3	0.59	116	30	32.88	8.17	0	1
VS_OsR_10	old secondary regrowth	30	1.1638	112.267	56	10.3	11.1	0.524	41.7	20	11.13	4.31	0	0
VS_OsR_11	old secondary regrowth	40	1.16491	112.266	18	24.5	19.9	0.515	107.9	7	4.21	2	0	0
VS_OsR_12	old secondary regrowth	50	1.16677	112.267	61	11.9	11.3	0.497	82.1	21	11.33	3.21	0	0
VS_YrG_1	young rubber garden	20	1.15136	112.263	33	13.9	9.5	0.503	31.2	9	4.08	1.83	0	0
VS_YrG_2	young rubber garden	7	1.15189	112.263	60	6.8	8.5	0.461	8.1	4	0.96	1.11	0	0
VS_YrG_3	young rubber garden	10	1.1529	112.263	63	9.6	9.4	0.43	19.2	12	4.4	2.86	0	0
VS_YrG_4	young rubber garden	10	1.1531	112.263	41	11.8	9.8	0.483	40.9	18	12.25	2.93	0	0
VS_YrG_5	young rubber garden	15	1.15551	112.265	58	9.1	8	0.477	15.6	13	5.21	3.22	0	0
VS_YrG_6	young rubber garden	18	1.14886	112.251	51	11.8	10.4	0.468	31.8	10	3.72	1.42	0	0
VS_YrG_7	young rubber garden	18	1.14878	112.251	66	11.4	10.2	0.492	39.3	16	6.72	2.36	0	0
VS_YrG_8	young rubber garden	17	1.15245	112.261	46	12.2	9.7	0.49	69.6	14	6.85	5.11	0	0
VS_YrG_9	young rubber garden	15	1.15184	112.262	50	12.9	9.3	0.476	65.2	12	5.01	1.92	0	0
VS_YrG_10	young rubber garden	5	1.15229	112.264	51	6.8	7.1	0.541	7.5	4	1.02	1.5	0	0
VS_YrG_11	young rubber garden	10	1.15463	112.265	59	10.2	10.4	0.472	28.4	15	6.49	4.21	0	0
VS_YrG_12	young rubber garden	20	1.15439	112.264	26	20.1	12.3	0.473	55.8	6	2.45	1.24	0	0
VS_OrG_1	old rubber garden	50	1.1554	112.262	25	14.5	10	0.563	40.8	18	28.82	5	0	0
VS_OrG_2	old rubber garden	50	1.15554	112.264	51	15.1	10.9	0.531	76.8	21	13.35	6.38	0	0
VS_OrG_3	old rubber garden	50	1.15496	112.264	65	13.2	10.1	0.513	68.1	22	11.7	4.33	0	0
VS_OrG_4	old rubber garden	50	1.15394	112.262	31	18.6	10.7	0.461	88.5	20	24.37	7.75	0	0
VS_OrG_5	old rubber garden	50	1.15405	112.262	29	15.8	11	0.492	51.3	14	10.65	4.14	0	0
VS_OrG_6	old rubber garden	40	1.15299	112.267	44	14.7	10.4	0.547	59.2	18	11.37	2.75	0	0
VS_OrG_7	old rubber garden	40	1.15383	112.268	30	17.7	12	0.523	50.2	18	19	3.75	0	0
VS_OrG_8	old rubber garden	35	1.15939	112.261	35	12.2	9.5	0.533	36	18	14.88	5	0	0
VS_OrG_9	old rubber garden	35	1.16002	112.259	35	15.7	11.7	0.537	58.6	20	19.39	5.83	0	0
VS_OrG_10	old rubber garden	30	1.14978	112.256	45	12.1	10.8	0.487	34.5	16	8.87	2.05	0	0
VS_OrG_11	old rubber garden	40	1.15033	112.257	24	20.8	13.3	0.552	79.8	13	11.58	4.8	0	0
VS_OrG_12	old rubber garden	50	1.15116	112.258	35	19.7	13.5	0.515	93.1	16	11.4	3.5	0	0
VS_LoF_1	logged-over forest	8-16	1.17636	112.265	48	11.2	8.8	0.537	41.2	28	28.11	8	0	1
VS_LoF_2	logged-over forest	8-16	1.17655	112.265	59	12.7	9.3	0.517	75.8	36	39.2	6.56	0	0
VS_LoF_3	logged-over forest	8-16	1.17678	112.265	54	13	8.7	0.553	69.8	35	43.07	13.5	0	1
VS_LoF_4	logged-over forest	8-16	1.17698	112.265	75	12.5	8.8	0.575	78.4	43	41.92	9.38	0	2
VS_LoF_5	logged-over forest	8-16	1.17718	112.265	48	14.3	8.4	0.549	76.2	24	19.1	6.86	0	1
VS_LoF_6	logged-over forest	8-16	1.17824	112.261	54	13.3	10.7	0.533	79.7	22	13.84	5.4	0	0
VS_LoF_7	logged-over forest	8-16	1.17842	112.261	50	13.6	11	0.489	64.5	20	12.35	5	0	0
VS_LoF_8	logged-over forest	8-16	1.1786	112.261	58	10.4	9.5	0.486	45.9	20	10.8	1.87	0	0
VS_LoF_9	logged-over forest	8-16	1.17879	112.261	64	11.5	9	0.502	48.9	27	17.6	3.2	0	0
VS_LoF_10	logged-over forest	8-16	1.17902	112.26	59	10.6	9.3	0.48	31.6	19	9.71	3.47	0	0
VS_LoF_11	logged-over forest	8-16	1.18548	112.259	122	8.5	8.4	0.521	32.2	48	29.18	2.77	1	4
VS_LoF_12	logged-over forest	8-16	1.18526	112.259	125	8.4	8.5	0.493	34.1	45	25.22	5.21	0	0
VS_LoF_13	logged-over forest	8-16	1.18507	112.259	100	9.2	8.7	0.522	33.3	43	28.61	4.17	0	0
VS_LoF_14	logged-over forest	8-16	1.18486	112.259	114	8.7	9.1	0.506	32.2	42	24.02	2.43	0	1
VS_LoF_15	logged-over forest	8-16	1.18459	112.259	119	8.1	8.6	0.539	38.8	64	56.42	7.93	2	4
VS_LoF_16	logged-over forest	8-16	1.1872	112.26	68	13.2	11.3	0.553	153.3	41	43.67	7.56	3	6
VS_LoF_17	logged-over forest	8-16	1.18702	112.26	105	11.1	9.4	0.577	93.8	41	24.74	7	2	5
VS_LoF_18	logged-over forest	8-16	1.1868	112.26	67	12.8	10.1	0.577	75	42	48.21	9.57	0	3
VS_LoF_19	logged-over forest	8-16	1.18657	112.26	53	12.1	9.7	0.558	50.9	34	40.93	10.6	2	2
VS_LoF_20	logged-over forest	8-16	1.18638	112.259	88	12.9	10.7	0.563	134.8	42	31.5	7.33	2	3
VS_LoF_21	logged-over forest	8-16	1.18975	112.26	73	12	10	0.546	68.6	38	31.95	8.11	0	0
VS_LoF_22	logged-over forest	8-16	1.18956	112.26	67	11.7	9.4	0.579	58.5	39	39.01	11.17	0	0
VS_LoF_23	logged-over forest	8-16	1.18936	112.26	74	11.8	9.6	0.552	77	38	31.35	7.4	0	0
VS_LoF_24	logged-over forest	8-16	1.18917	112.26	78	11.8	9.5	0.518	62.7	36	25.93	8.67	0	0
VS_LoF_25	logged-over forest	8-16	1.18894	112.26	61	9.9	7.8	0.508	31.2	28	20.04	2.26	0	0
VS_NaF_1	natural forest	nr	1.17827	112.256	50	15.7	15.1	0.607	193.8	25	19.9	10	3	6
VS_NaF_2	natural forest	nr	1.17847	112.256	55	15.8	14.4	0.627	194.8	35	41.43	11	2	6
VS_NaF_3	natural forest	nr	1.17865	112.255	55	15.7	15.2	0.609	231.3	31	29.39	7.86	4	8
VS_NaF_4	natural forest	nr	1.17883	112.255	54	14.6	14	0.581	193	34	39.37	13.5	3	6
VS_NaF_5	natural forest	nr	1.17903	112.255	62	15.6	15.3	0.572	259.5	37	38.67	6.2	3	7
VS_NaF_6	natural forest	nr	1.17784	112.256	73	12.5	13.9	0.618	135.7	35	26.4	10.43	4	7
VS_NaF_7	natural forest	nr	1.17804	112.256	53	18.4	18.3	0.644	213.4	24	16.91	4.82	3	5
VS_NaF_8	natural forest	nr	1.17819	112.256	71	13.4	15.3	0.607	165.2	37	31.16	10.14	4	9
VS_NaF_9	natural forest	nr	1.17837	112.256	81	14.4	15.9	0.642	328.3	29	16.17	5.4	4	7
VS_NaF_10	natural forest	nr	1.17856	112.256	61	14.1	15.8	0.642	172.5	35	34.17	8.71	3	6
VS_NaF_11	natural forest	nr	1.17741	112.257	82	14.2	13.9	0.608	179.1	47	45.8	13.67	3	5
VS_NaF_12	natural forest	nr	1.17755	112.257	58	13.5	14.5	0.601	142.7	37	44.02	9.67	0	2
VS_NaF_13	natural forest	nr	1.17772	112.257	69	13.2	14.2	0.582	154.4	40	39.73	13.8	2	6
VS_NaF_14	natural forest	nr	1.17788	112.256	52	11.8	14.1	0.608	99.8	35	46.94	13	2	4
VS_NaF_15	natural forest	nr	1.17806	112.256	81	12.9	15.2	0.605	137.7	41	33.17	11.57	3	6
VS_NaF_16	natural forest	nr	1.17691	112.257	63	11.7	12.6	0.612	107.4	39	43.67	12.6	2	3
VS_NaF_17	natural forest	nr	1.17709	112.257	84	12.1	12.7	0.615	149.6	42	33.43	6	1	5
VS_NaF_18	natural forest	nr	1.17725	112.257	82	13.4	13.4	0.594	203.7	46	43.28	11.71	0	2
VS_NaF_19	natural forest	nr	1.17741	112.257	64	12	13	0.567	79.6	33	27.38	4.57	0	3
VS_NaF_20	natural forest	nr	1.17757	112.257	82	11.1	12.3	0.623	92.9	45	40.9	9.11	0	2
VS_NaF_21	natural forest	nr	1.17639	112.258	44	13.2	13.5	0.593	82.2	36	92.6	22	2	3
VS_NaF_22	natural forest	nr	1.17654	112.258	63	12.9	14.1	0.594	125.3	40	47.12	10.5	0	1
VS_NaF_23	natural forest	nr	1.17668	112.258	81	12.8	13.3	0.6	126	44	39.37	9	0	1
VS_NaF_24	natural forest	nr	1.17683	112.258	70	11.6	11.3	0.598	96.4	47	62.66	8.75	0	0
VS_NaF_25	natural forest	nr	1.177	112.258	50	12.7	12.2	0.57	76.6	39	81.6	16.67	0	1
