# Supplementary material for: Ecosystem Services and Biodiversity in a Rapidly Transforming Landscape in Northern Borneo
Source: PLoS One. 2015 Oct 14;10(10):e0140423. doi: 10.1371/journal.pone.0140423 (PMC4605616; doi:10.1371/journal.pone.0140423)
Supplement: S3 Table — Longitude and latitude of each plot are provided in decimal degrees (WSG84 datum). Plot annual soil loss (ASL) and topsoil carbon (TSC) are also provided. ASL values in grey-tinted cells were discarded for analyses. (XLSX) [file pone.0140423.s004.xlsx]

## Sheet: erosion plot features
Plot ID	Land-use type	Time since last disturbance	Latitude	Longitude	Area (m2)	ASL (g m-2 yr-1)	TSC (Mg ha-1)
EM_FcF_1	food crop field	< 1	1.15589	112.267	62.8	2	41.8
EM_FcF_2	food crop field	< 1	1.156	112.267	62	1.1	52.1
EM_FcF_3	food crop field	< 1	1.15577	112.267	62.9	2.2	81.5
EM_FcF_4	food crop field	< 1	1.15682	112.267	57.4	3	36.5
EM_FcF_5	food crop field	< 1	1.1573	112.267	61	2.7	52.5
EM_YsR_1	young secondary regrowth	2	1.14945	112.264	61.8	5.1	45.9
EM_YsR_2	young secondary regrowth	2	1.14945	112.264	60.6	1.3	41
EM_YsR_3	young secondary regrowth	2	1.14943	112.264	62.8	0.5	39.1
EM_YsR_4	young secondary regrowth	7	1.15715	112.265	60.6	2.1	46.4
EM_YsR_5	young secondary regrowth	7	1.1571	112.265	60.8	1.8	35.1
EM_OsR_1	old secondary regrowth	40	1.15863	112.264	61.4	1.6	46.8
EM_OsR_2	old secondary regrowth	40	1.15866	112.264	58.9	1.5	33.1
EM_OsR_3	old secondary regrowth	50	1.15983	112.265	62	0.7	47.3
EM_OsR_4	old secondary regrowth	60	1.15985	112.265	61.5	1.2	44.1
EM_OsR_5	old secondary regrowth	60	1.16157	112.268	62	1.3	37.6
EM_YrG_1	young rubber garden	6	1.15194	112.263	64.9	8.1	45.2
EM_YrG_2	young rubber garden	6	1.15206	112.263	66.4	0.6	57.6
EM_YrG_3	young rubber garden	7	1.15261	112.264	61.8	1	52
EM_YrG_4	young rubber garden	8	1.15259	112.263	64.8	0.7	47.1
EM_YrG_5	young rubber garden	8	1.1527	112.263	63.8	1.2	62.6
EM_OrG_1	old rubber garden	40	1.15256	112.262	64.1	2.2	54.9
EM_OrG_2	old rubber garden	40	1.15536	112.264	60.4	1.1	46.2
EM_OrG_3	old rubber garden	40	1.15542	112.264	61.4	0.9	39.2
EM_OrG_4	old rubber garden	50	1.158	112.262	60.8	1.8	32.6
EM_OrG_5	old rubber garden	50	1.15793	112.262	64.3	2.1	55.4
EM_LoF_1	logged-over forest	8-16	1.17627	112.265	60.8	2.6	56.4
EM_LoF_2	logged-over forest	8-16	1.17512	112.266	61	0.6	88.6
EM_LoF_3	logged-over forest	8-16	1.16723	112.268	60.8	4.2	31.6
EM_LoF_4	logged-over forest	8-16	1.16671	112.268	62	1.3	48.1
EM_LoF_5	logged-over forest	8-16	1.16654	112.268	63.9	1.3	45.5
EM_NaF_1	natural forest	nr	1.17767	112.257	61	0.9	116.9
EM_NaF_2	natural forest	nr	1.17808	112.257	61	1.3	63.5
EM_NaF_3	natural forest	nr	1.17882	112.256	60.6	0.7	69.9
EM_NaF_4	natural forest	nr	1.17792	112.256	57.6	0.5	110
EM_NaF_5	natural forest	nr	1.17787	112.256	59.5	0.7	119.2
