# Supplementary material for: Ecosystem Services and Biodiversity in a Rapidly Transforming Landscape in Northern Borneo
Source: PLoS One. 2015 Oct 14;10(10):e0140423. doi: 10.1371/journal.pone.0140423 (PMC4605616; doi:10.1371/journal.pone.0140423)
Supplement: S4 Table — We used original indicator values when the distribution was normal and log10-transformed values otherwise. The vegetation set did not include food crop field plots under the assumption that tree diversity and aboveground carbon would be null. Depicted values are either test statistics (for Moran’s I, Lagrange Multiplier and the selected model) or model coefficients, and are presented along with information on statistical significance. For the Berger-Parker index, despite some spatial auto-correlation, the spatial dependence coefficient of the spatial error model was not significant. We therefore used a regular linear model and acknowledge that results for this indicator might be slightly biased due to spatial auto-correlation. (XLSX) [file pone.0140423.s005.xlsx]

## Sheet: statistical analyses
Plot set (nb plots)		Vegetation set (98)				Erosion set (35)
Indicator 1		AGC	Species richness	Fisher's α	Berger-Parker index	TSC	ASL
Data format		log10	original	log10	log10	log10	log10
Moran's I	on variable	0.41 ***	0.57 ***	0.46 ***	0.38 ***	0.46 ***	0.21 ns
	on linear model residuals	0.08 ***	0.19 ***	0.08 ***	0.05 **	-0.11 ns	0.01 ns
Lagrange Multiplier (LM)	LM err	4.52 *	18.73 ***	4.93 ***	1.74 ns	−	−
	LM lag	2.74 ns	12.92 ***	1.16 ns	0.66 ns	−	−
Selected model type 2		sem	sem	sem	lm	lm	lm
Model statistic 3		10.73 **	96.81 ***	11.82 ***	21.32 ***	6.20 ***	2.80 *
Model coefficients	Intercept (natural forest)	2.18 ***	40.27 ***	1.62 ***	0.99 ***	1.97 ***	-0.11 ns
	food crop field	−	−	−	−	-0.26 ***	0.43 **
	logged-over forest	-0.42 ***	-5.11 ns	-0.2 ns	-0.22 ***	-0.26 ***	0.21 ns
	old rubber garden	-0.42 ***	-22.78 ***	-0.48 ***	-0.35 ***	-0.32 ***	0.29 *
	old secondary regrowth	-0.39 ***	-17.55 ***	-0.42 ***	-0.28 ***	-0.35 ***	0.19 ns
	young rubber garden	-0.76 ***	-30.07 ***	-1.05 ***	-0.64 ***	-0.25 **	0.03 ns
	young secondary regrowth	-0.87 ***	-24.93 ***	-0.84 ***	-0.52 ***	-0.35 ***	0.20 ns
	Spatial dependence 4	0.59 *	0.86 ***	0.61 *	−	−	−
1 Indicator: AGC = aboveground carbon; TSC = topsoil carbon; ASL = annual soil loss
2 sem = spatial error model; lm = linear model
3 F statistic for linear models; Wald statistic for spatial error/lag model
4 Rho in case of spatial lag model, Lambda in case of spatial error model
n.s. non-significant; * p < 0.05; ** p < 0.01; *** p < 0.001
