# Supplementary material for: Ecosystem Services and Biodiversity in a Rapidly Transforming Landscape in Northern Borneo
Source: PLoS One. 2015 Oct 14;10(10):e0140423. doi: 10.1371/journal.pone.0140423 (PMC4605616; doi:10.1371/journal.pone.0140423)
Supplement: S5 Table — Data from plots under the same land-use type (12 for young and old rubber gardens and fallows and 25 for logged-over and natural forests) were pooled together. IUCN conservation status is provided for each species (CR = Critically Endangered; EN = Endangered; VU = Vulnerable; LR/cd = Lower Risk: Conservation Dependent; LR/nt = Lower Risk: Near Threatened; DD = Data Deficient; LC or LR/lc = Least Concern). In order to be conservative, any species identified to the genus level only (e.g. Aglaia sp.3) or absent from the IUCN Red List was given a “LC” status. (XLSX) [file pone.0140423.s006.xlsx]

## Sheet: young secondary regrowth
Genus	Species	Author(s)	Family	IUCN status
Adinandra	dumosa	Jack	Pentaphylacaceae	LC
Anisophyllea	corneri	Ding Hou	Anisophylleaceae	LR/lc
Antidesma	leucopodum	Miq.	Phyllanthaceae	LC
Antidesma	neurocarpum	Miq.	Phyllanthaceae	LC
Archidendron	clypearia	(Jack) I.C.Nielsen	Leguminosae	LC
Archidendron	havilandii	(Ridl.) I.C.Nielsen	Leguminosae	LC
Artocarpus	kemando	Miq.	Moraceae	LC
Artocarpus	odoratissimus	Blanco	Moraceae	LC
Baccaurea	polyneura	Hook.f.	Phyllanthaceae	LR/cd
Baccaurea	sumatrana	(Miq.) Müll.Arg.	Phyllanthaceae	LC
Bacopa	paraguariensis	subsp. congesta (Chodat & Hassl.) Hassl.	Plantaginaceae	LC
Bellucia	pentamera	Naudin	Melastomataceae	LC
Brookea	tomentosa	Benth.	Plantaginaceae	LC
Buchanania	sessilifolia	Blume	Anacardiaceae	LC
Calophyllum	pseudomolle	P.F.Stevens	Clusiaceae	LC
Cratoxylum	arborescens	(Vahl) Blume	Hypericaceae	LR/lc
Cratoxylum	formosum	(Jacq.) Benth. & Hook.f. ex Dyer	Hypericaceae	LR/lc
Crypteronia	cumingii	(Planch.) Endl.	Penaeaceae	LC
Dillenia	suffruticosa	(Griff.) Martelli	Dilleniaceae	LC
Durio	graveolens	Becc.	Malvaceae	LC
Elaeocarpus	mastersii	King	Elaeocarpaceae	LC
Elaeocarpus	stipularis	var. castaneus (Merr.) Coode	Elaeocarpaceae	LC
Ellipanthus	tomentosus	Kurz	Connaraceae	LC
Endertia	spectabilis	Steenis & de Wit	Leguminosae	LC
Endospermum	diadenum	(Miq.) Airy Shaw	Euphorbiaceae	LC
Fagraea	racemosa	Jack	Gentianaceae	LC
Ficus	aurata	(Miq.) Miq.	Moraceae	LC
Ficus	fulva	Reinw. ex Blume	Moraceae	LC
Ficus	grossularioides	Burm.f.	Moraceae	LC
Ficus	obscura	Blume	Moraceae	LC
Ficus	recurva	var. pedicellata Corner	Moraceae	LC
Ficus	sp.1		Moraceae	LC
Ficus	variegata	Blume	Moraceae	LC
Garcinia	caudiculata	Ridl.	Clusiaceae	LC
Glochidion	lutescens	Blume	Phyllanthaceae	LC
Glochidion	philippicum	(Cav.) C.B.Rob.	Phyllanthaceae	LC
Glochidion	rubrum	Blume	Phyllanthaceae	LC
Guioa	pleuropteris	(Blume) Radlk.	Sapindaceae	LC
Hevea	brasiliensis	(Willd. ex A.Juss.) Müll.Arg.	Euphorbiaceae	LC
Horsfieldia	grandis	(Hook.f.) Warb.	Myristicaceae	LR/lc
Ilex	cissoidea	Loes.	Aquifoliaceae	LC
Ixonanthes	petiolaris	Blume	Ixonanthaceae	LC
Koompassia	malaccensis	Benth.	Leguminosae	LR/cd
Lansium	parasiticum	(Osbeck) K.C.Sahni & Bennet	Meliaceae	LC
Leea	indica	(Burm. f.) Merr.	Vitaceae	LC
Lithocarpus	coopertus	(Blanco) Rehder	Fagaceae	LC
Litsea	elliptica	Blume	Lauraceae	LC
Macaranga	beccariana	Merr.	Euphorbiaceae	LC
Macaranga	conifera	(Rchb.f. & Zoll.) Müll.Arg.	Euphorbiaceae	LC
Macaranga	costulata	Pax & K.Hoffm.	Euphorbiaceae	LC
Macaranga	gigantea	(Rchb.f. & Zoll.) Müll.Arg.	Euphorbiaceae	LC
Macaranga	hypoleuca	(Rchb.f. & Zoll.) Müll.Arg.	Euphorbiaceae	LC
Macaranga	pearsonii	Merr.	Euphorbiaceae	LC
Macaranga	recurvata	Gage	Euphorbiaceae	LC
Macaranga	sp.1		Euphorbiaceae	LC
Mallotus	paniculatus	(Lam.) Müll.Arg.	Euphorbiaceae	LC
Melicope	glabra	(Blume) T.G. Hartley	Rutaceae	LC
Nauclea	officinalis	(Pierre ex Pit.) Merr. & Chun	Rubiaceae	LC
Nephelium	uncinatum	Radlk. ex Leenh.	Sapindaceae	LC
Phyllanthus	borneensis	Müll.Arg.	Phyllanthaceae	LC
Prunus	arborea	(Blume) Kalkman	Rosaceae	LR/lc
Prunus	arborea	var. stipulacea (King) Kalkman	Rosaceae	LR/lc
Pseuduvaria	reticulata	(Blume) Miq.	Annonaceae	LC
Santiria	tomentosa	Blume	Burseraceae	LR/lc
Saurauia	reinwardtiana	Blume	Actinidiaceae	LC
Saurauia	subcordata	Korth.	Actinidiaceae	LC
Symplocos	fasciculata	Zoll.	Symplocaceae	LC
Syzygium	fastigiatum	(Blume) Merr. & L.M.Perry	Myrtaceae	LC
Syzygium	glomeratum	(Lam.) DC.	Myrtaceae	LC
Syzygium	grande	(Wight) Walp.	Myrtaceae	LC
Syzygium	oligomyrum	Diels	Myrtaceae	LC
Syzygium	pallidilimbum	Merr. & L.M.Perry	Myrtaceae	LC
Syzygium	polyanthum	(Wight) Walp.	Myrtaceae	LC
Syzygium	sp.1		Myrtaceae	LC
Timonius	borneensis	Valeton	Rubiaceae	LC
Triadica	cochinchinensis	Lour.	Euphorbiaceae	LC
Urophyllum	corymbosum	(Blume) Korth.	Rubiaceae	LC
Vernonia	arborea	Buch.-Ham.	Compositae	LC
Vitex	pinnata	L.	Lamiaceae	LC
Vitex	quinata	(Lour.) F.N.Williams	Lamiaceae	LC
Xanthophyllum	adenotus	Miq.	Polygalaceae	LC
Xanthophyllum	ellipticum	Korth. ex Miq.	Polygalaceae	LC
Xylopia	ferruginea	(Hook.f. & Thomson) Baill.	Annonaceae	LC

## Sheet: old secondary regrowth
Genus	Species	Author(s)	Family	IUCN status
Adinandra	dumosa	Jack	Pentaphylacaceae	LC
Aglaia	silvestris	(M.Roem.) Merr.	Meliaceae	LR/nt
Anisophyllea	corneri	Ding Hou	Anisophylleaceae	LR/lc
Antidesma	leucopodum	Miq.	Phyllanthaceae	LC
Antidesma	neurocarpum	Miq.	Phyllanthaceae	LC
Aporosa	confusa	Gage	Phyllanthaceae	LC
Aporosa	falcifera	Hook.f.	Phyllanthaceae	LC
Archidendron	clypearia	(Jack) I.C.Nielsen	Leguminosae	LC
Ardisia	sanguinolenta	Blume	Primulaceae	LC
Artocarpus	dadah	Miq.	Moraceae	LC
Artocarpus	elasticus	Reinw. ex Blume	Moraceae	LC
Artocarpus	integer	(Thunb.) Merr.	Moraceae	LC
Artocarpus	nitidus	Trécul	Moraceae	LC
Artocarpus	odoratissimus	Blanco	Moraceae	LC
Baccaurea	macrophylla	(Müll.Arg.) Müll.Arg.	Phyllanthaceae	LC
Baccaurea	polyneura	Hook.f.	Phyllanthaceae	LR/cd
Baccaurea	sumatrana	(Miq.) Müll.Arg.	Phyllanthaceae	LC
Baccaurea	tetrandra	(Baill.) Müll.Arg.	Phyllanthaceae	LC
Barringtonia	lanceolata	(Ridl.) Payens	Lecythidaceae	LC
Barringtonia	macrostachya	(Jack) Kurz	Lecythidaceae	LC
Beilschmiedia	rivularis	Kosterm.	Lauraceae	LC
Bellucia	pentamera	Naudin	Melastomataceae	LC
Bhesa	paniculata	Arn.	Centroplacaceae	LR/lc
Buchanania	sessilifolia	Blume	Anacardiaceae	LC
Byttneria	sp.1		Malvaceae	LC
Calophyllum	pseudomolle	P.F.Stevens	Clusiaceae	LC
Calophyllum	sp.2		Calophyllaceae	LC
Calophyllum	teysmannii	Miq.	Clusiaceae	LC
Campnosperma	coriaceum	(Jack) Hallier f.	Anacardiaceae	LC
Castanopsis	hypophoenicea	(Seemen) Soepadmo	Fagaceae	LC
Castanopsis	inermis	(Lindl.) Benth. & Hook.f.	Fagaceae	LC
Cephalomappa	malloticarpa	J.J.Sm.	Euphorbiaceae	LC
Cratoxylum	arborescens	(Vahl) Blume	Hypericaceae	LR/lc
Crypteronia	cumingii	(Planch.) Endl.	Penaeaceae	LC
Dacryodes	rostrata	(Blume) H.J.Lam	Burseraceae	LR/lc
Dialium	indum	L.	Leguminosae	LC
Dillenia	excelsa	(Jack) Martelli ex Gilg.	Dilleniaceae	LC
Dillenia	suffruticosa	(Griff.) Martelli	Dilleniaceae	LC
Dimocarpus	longan	var. malaiensis Lour.	Sapindaceae	LR/nt
Diospyros	borneensis	Hiern	Ebenaceae	LC
Diospyros	venosa	Wall. ex A.DC.	Ebenaceae	LC
Dipterocarpus	crinitus	Dyer	Dipterocarpaceae	EN
Drepananthus	ramuliflorus	Maingay ex Hook.f. & Thomson	Annonaceae	LC
Durio	zibethinus	L.	Malvaceae	LC
Elaeocarpus	mastersii	King	Elaeocarpaceae	LC
Elaeocarpus	polystachyus	Wall. ex Müll.Berol.	Elaeocarpaceae	LC
Endospermum	diadenum	(Miq.) Airy Shaw	Euphorbiaceae	LC
Fagraea	racemosa	Jack	Gentianaceae	LC
Ficus	aurata	(Miq.) Miq.	Moraceae	LC
Ficus	fulva	Reinw. ex Blume	Moraceae	LC
Ficus	obscura	Blume	Moraceae	LC
Ficus	variegata	Blume	Moraceae	LC
Ficus	vasculosa	Wall. ex Miq.	Moraceae	LC
Fordia	splendidissima	(Miq.) Buijsen	Leguminosae	LC
Garcinia	bancana	Miq.	Clusiaceae	LC
Garcinia	caudiculata	Ridl.	Clusiaceae	LC
Garcinia	lateriflora	Blume	Clusiaceae	LC
Garcinia	mangostana	L.	Clusiaceae	LC
Garcinia	parvifolia	(Miq.) Miq.	Clusiaceae	LC
Gardenia	tubifera	Wall. ex Roxb.	Rubiaceae	LC
Gironniera	subaequalis	Planch.	Cannabaceae	LC
Glochidion	philippicum	(Cav.) C.B.Rob.	Phyllanthaceae	LC
Gynotroches	axillaris	Blume	Rhizophoraceae	LC
Hancea	penangensis	(Müll.Arg.) S.E.C.Sierra, Kulju & Welzen	Euphorbiaceae	LC
Hevea	brasiliensis	(Willd. ex A.Juss.) Müll.Arg.	Euphorbiaceae	LC
Horsfieldia	grandis	(Hook.f.) Warb.	Myristicaceae	LR/lc
Hydnocarpus	castanea	Hook.f. & Thomson	Achariaceae	LC
Ilex	cissoidea	Loes.	Aquifoliaceae	LC
Ilex	cymosa	Blume	Aquifoliaceae	LC
Intsia	palembanica	Miq.	Leguminosae	LC
Ixonanthes	petiolaris	Blume	Ixonanthaceae	LC
Knema	latericia	Elmer	Myristicaceae	LC
Knema	laurina	Warb.	Myristicaceae	LC
Kokoona	ochracea	Merr.	Celastraceae	LC
Koompassia	excelsa	(Becc.) Taub.	Leguminosae	LR/cd
Koompassia	malaccensis	Benth.	Leguminosae	LR/cd
Lithocarpus	coopertus	(Blanco) Rehder	Fagaceae	LC
Lithocarpus	gracilis	(Korth.) Soepadmo	Fagaceae	LC
Lithocarpus	leptogyne	(Korth.) Soepadmo	Fagaceae	LC
Lithocarpus	urceolaris	(Jack) Merr.	Fagaceae	LC
Litsea	elliptica	Blume	Lauraceae	LC
Litsea	sessiliflora	Hook.f.	Lauraceae	LC
Maasia	glauca	(Hassk.) Mols, Kessler & Rogstad	Annonaceae	LC
Macaranga	gigantea	(Rchb.f. & Zoll.) Müll.Arg.	Euphorbiaceae	LC
Macaranga	pearsonii	Merr.	Euphorbiaceae	LC
Macaranga	recurvata	Gage	Euphorbiaceae	LC
Macaranga	sp.1		Euphorbiaceae	LC
Mallotus	paniculatus	(Lam.) Müll.Arg.	Euphorbiaceae	LC
Mastixia	cuspidata	Blume	Cornaceae	LC
Microcos	crassifolia	Burret	Malvaceae	LC
Microcos	latifolia	Burret	Malvaceae	LC
Myristica	maxima	Warb.	Myristicaceae	LR/lc
Nauclea	officinalis	(Pierre ex Pit.) Merr. & Chun	Rubiaceae	LC
Nephelium	cuspidatum	Blume	Sapindaceae	LC
Nephelium	mangayi	Hiern	Sapindaceae	LC
Nephelium	ramboutan-ake	(Labill.) Leenh.	Sapindaceae	LC
Nephelium	uncinatum	Radlk. ex Leenh.	Sapindaceae	LC
Norrisia	maior	Soler.	Loganiaceae	LC
Ochanostachys	amentacea	Mast.	Olacaceae	DD
Palaquium	dasyphyllum	Pierre ex Dubard	Sapotaceae	LC
Palaquium	quercifolium	(de Vriese) Burck	Sapotaceae	LC
Parastemon	urophyllus	(Wall. ex A.DC.) A.DC.	Chrysobalanaceae	LC
Pellacalyx	axillaris	Korth.	Rhizophoraceae	LC
Pimelodendron	griffithianum	(Müll.Arg.) Benth. ex Hook.f.	Euphorbiaceae	LC
Porterandia	anisophylla	(Jack ex Roxb.) Ridl.	Rubiaceae	LC
Prunus	arborea	(Blume) Kalkman	Rosaceae	LR/lc
Prunus	grisea	(Blume ex Müll.Berol.) Kalkman	Rosaceae	LR/lc
Prunus	javanica	(Teijsm. & Binn.) Miq.	Rosaceae	LR/lc
Pternandra	crassicalyx	J.F.Maxwell	Melastomataceae	LC
Santiria	rubiginosa	Blume	Burseraceae	LC
Santiria	sp.		Burseraceae	LC
Santiria	tomentosa	Blume	Burseraceae	LR/lc
Sarcotheca	diversifolia	Hallier f.	Connaraceae	LC
Saurauia	subcordata	Korth.	Actinidiaceae	LC
Semecarpus	glauca	Engl.	Anacardiaceae	LC
Shorea	beccariana	Burck	Dipterocarpaceae	LC
Shorea	beccariana	cf. Burck	Dipterocarpaceae	LC
Shorea	confusa	P.S.Ashton	Dipterocarpaceae	LC
Sloetia	elongata	Koord.	Moraceae	LC
Sterculia	sp.1		Malvaceae	LC
Symplocos	fasciculata	Zoll.	Symplocaceae	LC
Symplocos	henschelii	(Moritzi) Benth. ex C.B. Clarke	Symplocaceae	LC
Syzygium	fastigiatum	(Blume) Merr. & L.M.Perry	Myrtaceae	LC
Syzygium	glomeratum	(Lam.) DC.	Myrtaceae	LC
Syzygium	grande	(Wight) Walp.	Myrtaceae	LC
Syzygium	lineatum	(DC.) Merr. & L.M.Perry	Myrtaceae	LC
Syzygium	oligomyrum	Diels	Myrtaceae	LC
Syzygium	pallidilimbum	Merr. & L.M.Perry	Myrtaceae	LC
Syzygium	polyanthum	(Wight) Walp.	Myrtaceae	LC
Syzygium	sp.1		Myrtaceae	LC
Syzygium	tawahense	(Korth.) Merr. & L.M.Perry	Myrtaceae	LC
Timonius	borneensis	Valeton	Rubiaceae	LC
Trigonopleura	malayana	Hook.f.	Peraceae	LC
Tristaniopsis	obovata	(Benn.) Peter G.Wilson & J.T.Waterh.	Myrtaceae	LC
Tristaniopsis	whiteana	(Griff.) Peter G.Wilson & J.T.Waterh.	Myrtaceae	LC
Urophyllum	corymbosum	(Blume) Korth.	Rubiaceae	LC
Vernonia	arborea	Buch.-Ham.	Compositae	LC
Vitex	pinnata	L.	Lamiaceae	LC
Vitex	quinata	(Lour.) F.N.Williams	Lamiaceae	LC
Xanthophyllum	amoenum	Chodat	Polygalaceae	LC
Xylopia	altissima	Boerl.	Annonaceae	LC
Xylopia	ferruginea	(Hook.f. & Thomson) Baill.	Annonaceae	LC

## Sheet: young rubber garden
Genus	Species	Author(s)	Family	IUCN status
Adinandra	dumosa	Jack	Pentaphylacaceae	LC
Antidesma	leucopodum	Miq.	Phyllanthaceae	LC
Aporosa	confusa	Gage	Phyllanthaceae	LC
Archidendron	clypearia	(Jack) I.C.Nielsen	Leguminosae	LC
Archidendron	havilandii	(Ridl.) I.C.Nielsen	Leguminosae	LC
Artocarpus	elasticus	Reinw. ex Blume	Moraceae	LC
Artocarpus	integer	(Thunb.) Merr.	Moraceae	LC
Artocarpus	kemando	Miq.	Moraceae	LC
Artocarpus	teysmannii	Miq.	Moraceae	LC
Baccaurea	macrophylla	(Müll.Arg.) Müll.Arg.	Phyllanthaceae	LC
Bellucia	pentamera	Naudin	Melastomataceae	LC
Bhesa	paniculata	Arn.	Centroplacaceae	LR/lc
Buchanania	sessilifolia	Blume	Anacardiaceae	LC
Calophyllum	pseudomolle	P.F.Stevens	Clusiaceae	LC
Citrus	aurantium	L.	Rutaceae	LC
Cratoxylum	arborescens	(Vahl) Blume	Hypericaceae	LR/lc
Cratoxylum	formosum	(Jacq.) Benth. & Hook.f. ex Dyer	Hypericaceae	LR/lc
Cratoxylum	sumatranum	(Jack) Blume	Hypericaceae	LC
Dacryodes	rostrata	(Blume) H.J.Lam	Burseraceae	LR/lc
Dillenia	indica	L.	Dilleniaceae	LC
Dillenia	suffruticosa	(Griff.) Martelli	Dilleniaceae	LC
Dimocarpus	longan	Lour.	Sapindaceae	LR/nt
Durio	graveolens	Becc.	Malvaceae	LC
Durio	zibethinus	L.	Malvaceae	LC
Elaeocarpus	stipularis	var. castaneus (Merr.) Coode	Elaeocarpaceae	LC
Endospermum	diadenum	(Miq.) Airy Shaw	Euphorbiaceae	LC
Ficus	aurata	(Miq.) Miq.	Moraceae	LC
Ficus	fulva	Reinw. ex Blume	Moraceae	LC
Hevea	brasiliensis	(Willd. ex A.Juss.) Müll.Arg.	Euphorbiaceae	LC
Horsfieldia	grandis	(Hook.f.) Warb.	Myristicaceae	LR/lc
Ilex	cissoidea	Loes.	Aquifoliaceae	LC
Ilex	cymosa	Blume	Aquifoliaceae	LC
Ixonanthes	petiolaris	Blume	Ixonanthaceae	LC
Koompassia	excelsa	(Becc.) Taub.	Leguminosae	LR/cd
Lithocarpus	blumeanus	(Korth.) Rehder	Fagaceae	LC
Lithocarpus	leptogyne	(Korth.) Soepadmo	Fagaceae	LC
Litsea	elliptica	Blume	Lauraceae	LC
Macaranga	beccariana	Merr.	Euphorbiaceae	LC
Macaranga	gigantea	(Rchb.f. & Zoll.) Müll.Arg.	Euphorbiaceae	LC
Macaranga	pearsonii	Merr.	Euphorbiaceae	LC
Macaranga	recurvata	Gage	Euphorbiaceae	LC
Mangifera	laurina	Blume	Anacardiaceae	LC
Mangifera	longipetiolata	King	Anacardiaceae	LC
Melanochyla	fulvinervia	(Blume) Ding Hou	Anacardiaceae	LC
Nauclea	officinalis	(Pierre ex Pit.) Merr. & Chun	Rubiaceae	LC
Nephelium	juglandifolium	Blume	Sapindaceae	LC
Nephelium	lappaceum	L.	Sapindaceae	LR/lc
Norrisia	maior	Soler.	Loganiaceae	LC
Norrisia	malaccensis	Gardner	Loganiaceae	LC
Parkia	timoriana	(DC.) Merr.	Leguminosae	LC
Pimelodendron	griffithianum	(Müll.Arg.) Benth. ex Hook.f.	Euphorbiaceae	LC
Prunus	arborea	(Blume) Kalkman	Rosaceae	LR/lc
Prunus	arborea	var. stipulacea (King) Kalkman	Rosaceae	LR/lc
Saurauia	bracteolata	DC.	Actinidiaceae	LC
Shorea	beccariana	cf. Burck	Dipterocarpaceae	LC
Syzygium	polyanthum	(Wight) Walp.	Myrtaceae	LC
Tarenna	confusa	(Blume) Valeton	Rubiaceae	LC
Timonius	borneensis	Valeton	Rubiaceae	LC
Vernonia	arborea	Buch.-Ham.	Compositae	LC
Vitex	pinnata	L.	Lamiaceae	LC
Vitex	quinata	(Lour.) F.N.Williams	Lamiaceae	LC
Xylopia	ferruginea	(Hook.f. & Thomson) Baill.	Annonaceae	LC

## Sheet: old rubber garden
Genus	Species	Author(s)	Family	IUCN status
Adinandra	dumosa	Jack	Pentaphylacaceae	LC
Anisophyllea	corneri	Ding Hou	Anisophylleaceae	LR/lc
Antidesma	leucopodum	Miq.	Phyllanthaceae	LC
Antidesma	neurocarpum	Miq.	Phyllanthaceae	LC
Aporosa	confusa	Gage	Phyllanthaceae	LC
Archidendron	clypearia	(Jack) I.C.Nielsen	Leguminosae	LC
Archidendron	havilandii	(Ridl.) I.C.Nielsen	Leguminosae	LC
Artocarpus	anisophyllus	Miq.	Moraceae	LC
Artocarpus	elasticus	Reinw. ex Blume	Moraceae	LC
Artocarpus	integer	(Thunb.) Merr.	Moraceae	LC
Artocarpus	kemando	Miq.	Moraceae	LC
Artocarpus	odoratissimus	Blanco	Moraceae	LC
Baccaurea	edulis	Merr.	Phyllanthaceae	LC
Baccaurea	macrophylla	(Müll.Arg.) Müll.Arg.	Phyllanthaceae	LC
Baccaurea	minor	Hook.f.	Phyllanthaceae	LC
Baccaurea	polyneura	Hook.f.	Phyllanthaceae	LR/cd
Baccaurea	sumatrana	(Miq.) Müll.Arg.	Phyllanthaceae	LC
Barringtonia	lanceolata	(Ridl.) Payens	Lecythidaceae	LC
Bellucia	pentamera	Naudin	Melastomataceae	LC
Bhesa	paniculata	Arn.	Centroplacaceae	LR/lc
Buchanania	arborescens	(Blume) Blume	Anacardiaceae	LC
Buchanania	sessilifolia	Blume	Anacardiaceae	LC
Calophyllum	pseudomolle	P.F.Stevens	Clusiaceae	LC
Calophyllum	soulattri	Burm.f.	Clusiaceae	LR/lc
Calophyllum	tetrapterum	Miq.	Clusiaceae	LR/lc
Calophyllum	teysmannii	Miq.	Clusiaceae	LC
Campnosperma	coriaceum	(Jack) Hallier f.	Anacardiaceae	LC
Castanopsis	megacarpa	Gamble	Fagaceae	LC
Cratoxylum	arborescens	(Vahl) Blume	Hypericaceae	LR/lc
Cratoxylum	formosum	(Jacq.) Benth. & Hook.f. ex Dyer	Hypericaceae	LR/lc
Cratoxylum	sumatranum	(Jack) Blume	Hypericaceae	LC
Crypteronia	cumingii	(Planch.) Endl.	Penaeaceae	LC
Dacryodes	rostrata	(Blume) H.J.Lam	Burseraceae	LR/lc
Dialium	indum	L.	Leguminosae	LC
Dialium	platysepalum	Baker	Leguminosae	LC
Dillenia	suffruticosa	(Griff.) Martelli	Dilleniaceae	LC
Dimocarpus	longan	var. malaiensis Lour.	Sapindaceae	LR/nt
Elaeocarpus	mastersii	King	Elaeocarpaceae	LC
Elaeocarpus	stipularis	var. castaneus (Merr.) Coode	Elaeocarpaceae	LC
Engelhardtia	serrata	Blume	Juglandaceae	LR/lc
Ficus	glandulifera	(Wall. ex Miq.) King	Moraceae	LC
Garcinia	caudiculata	Ridl.	Clusiaceae	LC
Garcinia	mangostana	L.	Clusiaceae	LC
Garcinia	parvifolia	(Miq.) Miq.	Clusiaceae	LC
Gardenia	tubifera	Wall. ex Roxb.	Rubiaceae	LC
Gironniera	nervosa	Planch.	Cannabaceae	LC
Gironniera	subaequalis	Planch.	Cannabaceae	LC
Guioa	pleuropteris	(Blume) Radlk.	Sapindaceae	LC
Hevea	brasiliensis	(Willd. ex A.Juss.) Müll.Arg.	Euphorbiaceae	LC
Homalanthus	populneus	(Geiseler) Pax	Euphorbiaceae	LC
Horsfieldia	grandis	(Hook.f.) Warb.	Myristicaceae	LR/lc
Ixonanthes	petiolaris	Blume	Ixonanthaceae	LC
Knema	laurina	Warb.	Myristicaceae	LC
Koompassia	malaccensis	Benth.	Leguminosae	LR/cd
Lansium	parasiticum	(Osbeck) K.C.Sahni & Bennet	Meliaceae	LC
Lithocarpus	bennettii	(Miq.) Rehder	Fagaceae	LC
Lithocarpus	urceolaris	(Jack) Merr.	Fagaceae	LC
Litsea	elliptica	Blume	Lauraceae	LC
Litsea	garciae	Vidal	Lauraceae	LC
Macaranga	depressa	(Müll.Arg.) Müll.Arg.	Euphorbiaceae	LC
Macaranga	hypoleuca	(Rchb.f. & Zoll.) Müll.Arg.	Euphorbiaceae	LC
Macaranga	pearsonii	Merr.	Euphorbiaceae	LC
Macaranga	recurvata	Gage	Euphorbiaceae	LC
Mallotus	mollissimus	(Geiseler) Airy Shaw	Euphorbiaceae	LC
Nauclea	officinalis	(Pierre ex Pit.) Merr. & Chun	Rubiaceae	LC
Nephelium	cuspidatum	Blume var. robustum (Radlk.) Leenh.	Sapindaceae	LC
Nephelium	cuspidatum	Blume	Sapindaceae	LC
Nephelium	juglandifolium	Blume	Sapindaceae	LC
Nephelium	lappaceum	L.	Sapindaceae	LR/lc
Nephelium	mangayi	Hiern	Sapindaceae	LC
Nephelium	ramboutan-ake	(Labill.) Leenh.	Sapindaceae	LC
Nephelium	uncinatum	Radlk. ex Leenh.	Sapindaceae	LC
Norrisia	maior	Soler.	Loganiaceae	LC
Norrisia	malaccensis	Gardner	Loganiaceae	LC
Ochanostachys	amentacea	Mast.	Olacaceae	DD
Palaquium	quercifolium	(de Vriese) Burck	Sapotaceae	LC
Pentace	triptera	Mast.	Malvaceae	LC
Pimelodendron	griffithianum	(Müll.Arg.) Benth. ex Hook.f.	Euphorbiaceae	LC
Porterandia	anisophylla	(Jack ex Roxb.) Ridl.	Rubiaceae	LC
Prunus	arborea	(Blume) Kalkman	Rosaceae	LR/lc
Psychotria	viridiflora	Reinw. ex Blume	Rubiaceae	LC
Pternandra	crassicalyx	J.F.Maxwell	Melastomataceae	LC
Santiria	rubiginosa	Blume	Burseraceae	LC
Santiria	sp.		Burseraceae	LC
Sarcotheca	diversifolia	Hallier f.	Connaraceae	LC
Semecarpus	glauca	Engl.	Anacardiaceae	LC
Shorea	beccariana	cf. Burck	Dipterocarpaceae	LC
Sympetalandra	borneensis	Stapf	Leguminosae	LC
Symplocos	fasciculata	Zoll.	Symplocaceae	LC
Syzygium	glomeratum	(Lam.) DC.	Myrtaceae	LC
Syzygium	grande	(Wight) Walp.	Myrtaceae	LC
Syzygium	leptostemon	(Korth.) Merr. & L.M.Perry	Myrtaceae	LC
Syzygium	pallidilimbum	Merr. & L.M.Perry	Myrtaceae	LC
Syzygium	polyanthum	(Wight) Walp.	Myrtaceae	LC
Syzygium	sp.1		Myrtaceae	LC
Syzygium	tawahense	(Korth.) Merr. & L.M.Perry	Myrtaceae	LC
Syzygium	valdevenosum	(Duthie) Merr. & L.M.Perry	Myrtaceae	LC
Tabernaemontana	macrocarpa	Jack	Apocynaceae	LC
Timonius	borneensis	Valeton	Rubiaceae	LC
Trigonopleura	malayana	Hook.f.	Peraceae	LC
Tristaniopsis	obovata	(Benn.) Peter G.Wilson & J.T.Waterh.	Myrtaceae	LC
Vernonia	arborea	Buch.-Ham.	Compositae	LC
Vitex	quinata	(Lour.) F.N.Williams	Lamiaceae	LC
Xanthophyllum	flavescens	Roxb.	Polygalaceae	LC
Xylopia	altissima	Boerl.	Annonaceae	LC
Xylopia	ferruginea	(Hook.f. & Thomson) Baill.	Annonaceae	LC

## Sheet: logged-over forest
Genus	Species	Author(s)	Family	IUCN status
Actinodaphne	borneensis	Meisn.	Lauraceae	LC
Actinodaphne	sp.1		Lauraceae	LC
Adinandra	cordifolia	Ridl.	Pentaphylacaceae	LC
Adinandra	dumosa	Jack	Pentaphylacaceae	LC
Adinandra	sarosanthera	Miq.	Pentaphylacaceae	LC
Aglaia	exstipulata	(Griff.) W.Theob.	Meliaceae	LR/nt
Aglaia	sexipetala	Griff.	Meliaceae	LR/nt
Aglaia	sp.1		Meliaceae	LC
Aglaia	sp.2		Meliaceae	LC
Aglaia	sp.3		Meliaceae	LC
Agrostistachys	indica	Dalzell	Euphorbiaceae	LC
Alangium	ridleyi	King	Cornaceae	LC
Amyxa	pluricornis	(Radlk.) Domke	Thymelaeaceae	LC
Anisophyllea	ferruginea	Ding Hou	Anisophylleaceae	VU
Antidesma	leucopodum	Miq.	Phyllanthaceae	LC
Aporosa	falcifera	Hook.f.	Phyllanthaceae	LC
Aporosa	lucida	(Miq.) Airy Shaw	Phyllanthaceae	LC
Aporosa	prainiana	King ex Gage	Phyllanthaceae	LC
Aporosa	subcaudata	Merr.	Phyllanthaceae	LC
Archidendron	clypearia	(Jack) I.C.Nielsen	Leguminosae	LC
Archidendron	microcarpum	(Benth.) I.C.Nielsen	Leguminosae	LC
Archidendron	sp.		Leguminosae	LC
Ardisia	fuliginosa	Blume	Primulaceae	LC
Ardisia	sp.1		Primulaceae	LC
Artocarpus	elasticus	Reinw. ex Blume	Moraceae	LC
Artocarpus	nitidus	Trécul	Moraceae	LC
Artocarpus	odoratissimus	Blanco	Moraceae	LC
Artocarpus	rigidus	Blume	Moraceae	LC
Atuna	racemosa	Raf.	Chrysobalanaceae	LC
Baccaurea	macrocarpa	(Miq.) Müll.Arg.	Phyllanthaceae	LC
Baccaurea	macrophylla	cf. macrophylla (Müll.Arg.) Müll.Arg.	Phyllanthaceae	LC
Baccaurea	parviflora	(Müll.Arg.) Müll.Arg.	Phyllanthaceae	LC
Baccaurea	sp.1		Phyllanthaceae	LC
Baccaurea	sumatrana	(Miq.) Müll.Arg.	Phyllanthaceae	LC
Barringtonia	lanceolata	(Ridl.) Payens	Lecythidaceae	LC
Barringtonia	macrostachya	(Jack) Kurz	Lecythidaceae	LC
Beilschmiedia	gemmiflora	(Blume) Kosterm.	Lauraceae	LC
Beilschmiedia	sp.1		Lauraceae	LC
Bellucia	pentamera	Naudin	Melastomataceae	LC
Bhesa	paniculata	Arn.	Centroplacaceae	LR/lc
Buchanania	insignis	Blume	Anacardiaceae	LC
Calophyllum	biflorum	M.R.Hend. & Wyatt-Sm.	Clusiaceae	LC
Calophyllum	dasypodium	Miq.	Clusiaceae	LC
Calophyllum	pseudomolle	P.F.Stevens	Clusiaceae	LC
Calophyllum	pulcherrimum	Wall. ex Choisy	Clusiaceae	LC
Calophyllum	rigidum	Miq.	Clusiaceae	LC
Calophyllum	sclerophyllum	Vesque	Clusiaceae	LC
Calophyllum	soulattri	Burm.f.	Clusiaceae	LR/lc
Calophyllum	sp.1		Clusiaceae	LC
Calophyllum	venulosum	Zoll.	Clusiaceae	LC
Campnosperma	auriculatum	(Blume) Hook.f.	Anacardiaceae	LC
Canarium	littorale	Blume	Burseraceae	LR/lc
Canarium	patentinervium	Miq.	Burseraceae	LR/lc
Canarium	sp.1		Burseraceae	LC
Castanopsis	inermis	(Lindl.) Benth. & Hook.f.	Fagaceae	LC
Castanopsis	malaccensis	Gamble	Fagaceae	LC
Castanopsis	sp.1		Fagaceae	LC
Cephalomappa	paludicola	Airy Shaw	Euphorbiaceae	LC
Chionanthus	pluriflorus	(Knobl.) Kiew	Oleaceae	LC
Cinnamomum	pendulum	Cammerl.	Lauraceae	LC
Cleistanthus	sp.1		Phyllanthaceae	LC
Cratoxylum	arborescens	(Vahl) Blume	Hypericaceae	LR/lc
Crypteronia	cumingii	(Planch.) Endl.	Penaeaceae	LC
Cryptocarya	densiflora	Blume	Lauraceae	LC
Cryptocarya	lucida	Blume	Lauraceae	LC
Ctenolophon	parvifolius	Oliv.	Ctenolophonaceae	LC
Cyathocalyx	sumatranus	Scheff.	Annonaceae	LR/lc
Dacryodes	costata	(A.W.Benn.) H.J.Lam	Burseraceae	LR/lc
Dacryodes	laxa	(A.W.Benn.) H.J.Lam	Burseraceae	LR/lc
Dacryodes	rugosa	(Blume) H.J.Lam	Burseraceae	LC
Dialium	indum	L.	Leguminosae	LC
Dialium	sp.		Leguminosae	LC
Dillenia	eximia	Miq.	Dilleniaceae	LC
Diospyros	foxworthyi	Bakh.	Ebenaceae	LR/lc
Diospyros	korthalsiana	Hiern	Ebenaceae	LC
Diospyros	rostrata	(Merr.) Bakh.	Ebenaceae	LC
Diospyros	venosa	Wall. ex A.DC.	Ebenaceae	LC
Diospyros	vera	(Lour.) A.Chev.	Ebenaceae	LC
Dipterocarpus	caudiferus	Merr.	Dipterocarpaceae	LC
Dipterocarpus	pachyphyllus	cf. pachyphyllus Meijer	Dipterocarpaceae	LC
Drepananthus	biovulatus	(Boerl.) Survesw. & R.M.K.Saunders	Annonaceae	LC
Drepananthus	havilandii	(Boerl.) Survesw. & R.M.K.Saunders	Annonaceae	LC
Drimycarpus	luridus	(Hook.f.) Ding Hou	Anacardiaceae	LC
Dryobalanops	beccarii	Dyer	Dipterocarpaceae	EN
Drypetes	crassipes	Pax & K.Hoffm.	Putranjivaceae	LC
Durio	carinatus	Mast.	Malvaceae	LC
Dysoxylum	sp.1		Meliaceae	LC
Dysoxylum	sp.2		Meliaceae	LC
Elaeocarpus	floribundus	Blume	Elaeocarpaceae	LC
Elaeocarpus	mastersii	King	Elaeocarpaceae	LC
Elaeocarpus	nitidus	Jack	Elaeocarpaceae	LC
Elaeocarpus	polystachyus	Wall. ex Müll.Berol.	Elaeocarpaceae	LC
Elaeocarpus	sp.1		Elaeocarpaceae	LC
Elaeocarpus	sp.2		Elaeocarpaceae	LC
Elaeocarpus	sp.3		Elaeocarpaceae	LC
Elaeocarpus	stipularis	var. castaneus (Merr.) Coode	Elaeocarpaceae	LC
Endiandra	sp.		Lauraceae	LC
Endospermum	diadenum	(Miq.) Airy Shaw	Euphorbiaceae	LC
Erycibe	borneensis	(Merr.) Hoogland	Convolvulaceae	LC
Fagraea	elliptica	Roxb.	Gentianaceae	LC
Fagraea	racemosa	Jack	Gentianaceae	LC
Ficus	aurata	(Miq.) Miq.	Moraceae	LC
Ficus	binnendijkii	Miq.	Moraceae	LC
Ficus	obscura	Blume	Moraceae	LC
Ficus	recurva	var. pedicellata Corner	Moraceae	LC
Ficus	trachypison	K.Schum. & Lauterb.	Moraceae	LC
Fissistigma	sp.		Annonaceae	LC
Fordia	splendidissima	(Miq.) Buijsen	Leguminosae	LC
Garcinia	caudiculata	Ridl.	Clusiaceae	LC
Garcinia	parvifolia	(Miq.) Miq.	Clusiaceae	LC
Garcinia	rigida	Miq.	Clusiaceae	LC
Garcinia	sp.		Clusiaceae	LC
Garcinia	vidua	Ridl.	Clusiaceae	LC
Gardenia	forsteniana	Miq.	Rubiaceae	LC
Gironniera	nervosa	Planch.	Cannabaceae	LC
Gironniera	subaequalis	Planch.	Cannabaceae	LC
Glochidion	philippicum	(Cav.) C.B.Rob.	Phyllanthaceae	LC
Glochidion	sp.1		Phyllanthaceae	LC
Glochidion	sp.2		Phyllanthaceae	LC
Glochidion	zeylanicum	(Gaertn.) A.Juss.	Phyllanthaceae	LC
Gluta	aptera	(King) Ding Hou	Anacardiaceae	LC
Gluta	renghas	L.	Anacardiaceae	LC
Gluta	wallichii	(Hook.f.) Ding Hou	Anacardiaceae	LC
Gomphia	serrata	(Gaertn.) Kanis	Ochnaceae	LR/lc
Goniothalamus	tapis	Miq.	Annonaceae	LC
Gonocaryum	gracile	Miq.	Cardiopteridaceae	LC
Gonystylus	forbesii	Gilg	Thymelaeaceae	LC
Gonystylus	sp.		Thymelaeaceae	LC
Gordonia	sp.		Theaceae	LC
Gymnacranthera	forbesii	(King) Warb.	Myristicaceae	LC
Hopea	myrtifolia	Miq.	Dipterocarpaceae	LC
Hopea	pachycarpa	(F.Heim) Symington	Dipterocarpaceae	VU
Hopea	tenuivervula	P.S.Ashton	Dipterocarpaceae	CR
Horsfieldia	crassifolia	(Hook.f. & Thomson) Warb.	Myristicaceae	LR/nt
Horsfieldia	grandis	(Hook.f.) Warb.	Myristicaceae	LR/lc
Horsfieldia	polyspherula	(Hook.f. ex King) J.Sinclair	Myristicaceae	LC
Hydnocarpus	castanea	Hook.f. & Thomson	Achariaceae	LC
Hydnocarpus	gracilis	(Slooten) Sleumer	Achariaceae	LC
Hydnocarpus	kunstleri	(King) Warb.	Achariaceae	LC
Hydnocarpus	sp.1		Achariaceae	LC
Hydnocarpus	woodii	Merr.	Achariaceae	LC
Ilex	cissoidea	Loes.	Aquifoliaceae	LC
Ixonanthes	petiolaris	Blume	Ixonanthaceae	LC
Ixora	sp.		Rubiaceae	LC
Knema	cinerea	Warb.	Myristicaceae	LC
Knema	conferta	(King) Warb.	Myristicaceae	LR/lc
Knema	furfuracea	(Hook. f. & Thomson) Warb.	Myristicaceae	LR/lc
Knema	sp.		Myristicaceae	LC
Knema	sp.1		Myristicaceae	LC
Knema	sp.2		Myristicaceae	LC
Kokoona	ochracea	Merr.	Celastraceae	LC
Lithocarpus	blumeanus	(Korth.) Rehder	Fagaceae	LC
Lithocarpus	sp.		Fagaceae	LC
Lithocarpus	sp.3		Fagaceae	LC
Lithocarpus	sp.4		Fagaceae	LC
Litsea	costalis	var. nidularis (Gamble) Ng	Lauraceae	LC
Litsea	firma	(Blume) Hook.f.	Lauraceae	LC
Litsea	lanceolata	(Blume) Kosterm.	Lauraceae	LC
Litsea	sessiliflora	Hook.f.	Lauraceae	LC
Litsea	sp.1		Lauraceae	LC
Lophopetalum	beccarianum	Pierre	Celastraceae	LC
Lophopetalum	multinervium	Ridl.	Celastraceae	LC
Maasia	glauca	(Hassk.) Mols, Kessler & Rogstad	Annonaceae	LC
Maasia	sumatrana	(Miq.) Mols, Kessler & Rogstad	Annonaceae	LC
Macaranga	beccariana	Merr.	Euphorbiaceae	LC
Macaranga	gigantea	(Rchb.f. & Zoll.) Müll.Arg.	Euphorbiaceae	LC
Macaranga	hullettii	King ex Hook.f.	Euphorbiaceae	LC
Macaranga	lowii	King ex Hook.f.	Euphorbiaceae	LC
Macaranga	pearsonii	Merr.	Euphorbiaceae	LC
Macaranga	pruinosa	(Miq.) Müll.Arg.	Euphorbiaceae	LC
Macaranga	triloba	(Thunb.) Müll.Arg.	Euphorbiaceae	LC
Madhuca	korthalsii	(Pierre ex Burck) H.J.Lam	Sapotaceae	LC
Madhuca	sericea	(Miq.) S.Moore	Sapotaceae	LC
Madhuca	sp.1		Sapotaceae	LC
Magnolia	liliifera	(L.) Baill.	Magnoliaceae	LC
Mallotus	peltatus	(Geiseler) Müll.Arg.	Euphorbiaceae	LC
Mallotus	rufidulus	(Miq.) Müll.Arg.	Euphorbiaceae	LC
Mangifera	laurina	Blume	Anacardiaceae	LC
Mangifera	sp.		Anacardiaceae	LC
Mangifera	swintonioides	Kosterm.	Anacardiaceae	LC
Melanochyla	caesia	(Blume) Ding Hou	Anacardiaceae	LC
Melanochyla	fulvinervia	(Blume) Ding Hou	Anacardiaceae	LC
Melicope	accedens	(Blume) T.G. Hartley	Rutaceae	LC
Mesua	beccariana	(Baill.) Kosterm.	Calophyllaceae	LC
Mesua	elmeri	(Merr.) Kosterm.	Calophyllaceae	LC
Mesua	macrantha	(Baill.) Kosterm.	Calophyllaceae	LC
Microcos	crassifolia	Burret	Malvaceae	LC
Microcos	hirsuta	(Korth.) Burret	Malvaceae	LC
Myristica	iners	Blume	Myristicaceae	LR/lc
Neonauclea	calycina	(Bartl. ex DC.) Merr.	Rubiaceae	LC
Nephelium	cuspidatum	Blume	Sapindaceae	LC
Nephelium	mangayi	Hiern	Sapindaceae	LC
Nephelium	ramboutan-ake	(Labill.) Leenh.	Sapindaceae	LC
Ochanostachys	amentacea	Mast.	Olacaceae	DD
Palaquium	dasyphyllum	Pierre ex Dubard	Sapotaceae	LC
Palaquium	quercifolium	(de Vriese) Burck	Sapotaceae	LC
Parishia	insignis	Hook.f.	Anacardiaceae	LC
Payena	lucida	A.DC.	Sapotaceae	LC
Pellacalyx	axillaris	Korth.	Rhizophoraceae	LC
Pentace	borneensis	Pierre	Malvaceae	LC
Pentace	polyantha	Hassk.	Malvaceae	LC
Pentace	sp.		Malvaceae	LC
Phoebe	grandis	(Nees) Merr.	Lauraceae	LC
Phyllanthus	borneensis	Müll.Arg.	Phyllanthaceae	LC
Polyalthia	cauliflora	Hook.f. & Thomson	Annonaceae	LC
Polyalthia	rumphii	(Blume ex Hensch.) Merr.	Annonaceae	LC
Porterandia	anisophylla	(Jack ex Roxb.) Ridl.	Rubiaceae	LC
Prunus	arborea	(Blume) Kalkman	Rosaceae	LR/lc
Psydrax	dicoccos	Gaertn.	Rubiaceae	VU
Pternandra	azurea	(DC.) Burkill	Melastomataceae	LC
Pternandra	caerulescens	Jack	Melastomataceae	LC
Pternandra	crassicalyx	J.F.Maxwell	Melastomataceae	LC
Quercus	subsericea	A.Camus	Fagaceae	LC
Rinorea	bengalensis	(Wall.) Kuntze	Violaceae	LC
Santiria	apiculata	A.W.Benn.	Burseraceae	LR/lc
Santiria	griffithii	Engl.	Burseraceae	LR/lc
Santiria	laevigata	Blume	Burseraceae	LR/lc
Santiria	mollissima	Ridl.	Burseraceae	LC
Santiria	oblongifolia	Blume	Burseraceae	LC
Santiria	tomentosa	Blume	Burseraceae	LR/lc
Saurauia	nudiflora	DC.	Actinidiaceae	LC
Scaphium	macropodum	(Miq.) Beumée ex K.Heyne	Malvaceae	LR/lc
Semecarpus	cuneiformis	Blanco	Anacardiaceae	LC
Semecarpus	glauca	Engl.	Anacardiaceae	LC
Shorea	beccariana	Burck	Dipterocarpaceae	LC
Shorea	elliptica	Burck	Dipterocarpaceae	CR
Shorea	faguetiana	F.Heim	Dipterocarpaceae	EN
Shorea	gibbosa	Brandis	Dipterocarpaceae	CR
Shorea	glauca	cf. glauca King	Dipterocarpaceae	EN
Shorea	laevis	Ridl.	Dipterocarpaceae	LR/lc
Shorea	macroptera	Dyer	Dipterocarpaceae	LC
Shorea	maxwelliana	King	Dipterocarpaceae	EN
Shorea	parvifolia	Dyer	Dipterocarpaceae	LC
Shorea	peltata	Symington	Dipterocarpaceae	CR
Shorea	pilosa	P.S.Ashton	Dipterocarpaceae	LC
Shorea	pinanga	Scheff.	Dipterocarpaceae	LC
Shorea	retinodes	Slooten	Dipterocarpaceae	LC
Shorea	sagittata	P.S.Ashton	Dipterocarpaceae	CR
Sterculia	sp.		Malvaceae	LC
Strombosia	ceylanica	Gardner	Olacaceae	LC
Swintonia	glauca	Engl.	Anacardiaceae	LC
Syzygium	claviflorum	(Roxb.) Wall. ex A.M.Cowan & Cowan	Myrtaceae	LC
Syzygium	fastigiatum	(Blume) Merr. & L.M.Perry	Myrtaceae	LC
Syzygium	grande	(Wight) Walp.	Myrtaceae	LC
Syzygium	incarnatum	(Elmer) Merr. & L.M.Perry	Myrtaceae	LC
Syzygium	leptostemon	(Korth.) Merr. & L.M.Perry	Myrtaceae	LC
Syzygium	lineatum	(DC.) Merr. & L.M.Perry	Myrtaceae	LC
Syzygium	napiforme	(Koord. & Valeton) Merr. & L.M.Perry	Myrtaceae	LC
Syzygium	oligomyrum	Diels	Myrtaceae	LC
Syzygium	rosaceum	Diels	Myrtaceae	LC
Syzygium	sp.		Myrtaceae	LC
Syzygium	sp.1		Myrtaceae	LC
Syzygium	sp.2		Myrtaceae	LC
Syzygium	sp.3		Myrtaceae	LC
Syzygium	sp.4		Myrtaceae	LC
Syzygium	sp.5		Myrtaceae	LC
Syzygium	sp.6		Myrtaceae	LC
Syzygium	sp.7		Myrtaceae	LC
Syzygium	sp.8		Myrtaceae	LC
Syzygium	valdevenosum	(Duthie) Merr. & L.M.Perry	Myrtaceae	LC
Tabernaemontana	macrocarpa	Jack	Apocynaceae	LC
Tarenna	dasyphylla	(Miq.) Valeton ex Steenis	Rubiaceae	LC
Teijsmanniodendron	coriaceum	(C.B.Clarke) Kosterm.	Lamiaceae	LC
Timonius	borneensis	Valeton	Rubiaceae	LC
Trigonopleura	malayana	Hook.f.	Peraceae	LC
Tristaniopsis	whiteana	(Griff.) Peter G.Wilson & J.T.Waterh.	Myrtaceae	LC
undetermined	n°1		Magnoliaceae	LC
Urophyllum	arboreum	(Reinw. ex Blume) Korth.	Rubiaceae	LC
Urophyllum	corymbosum	(Blume) Korth.	Rubiaceae	LC
Urophyllum	enneandrum	(Wight) Ridl.	Rubiaceae	LC
Vatica	micrantha	Slooten	Dipterocarpaceae	LC
Vatica	pauciflora	cf. Blume	Dipterocarpaceae	EN
Vatica	pauciflora	Blume	Dipterocarpaceae	EN
Vatica	sp.1		Dipterocarpaceae	LC
Vatica	venulosa	Blume	Dipterocarpaceae	CR
Xanthophyllum	flavescens	Roxb.	Polygalaceae	LC
Xanthophyllum	obscurum	A.W.Benn.	Polygalaceae	LC
Xerospermum	laevigatum	Radlk.	Sapindaceae	LC
Xylopia	ferruginea	(Hook.f. & Thomson) Baill.	Annonaceae	LC
Xylopia	malayana	Hook.f. & Thomson	Annonaceae	LC

## Sheet: natural forest
Genus	Species	Author(s)	Family	IUCN status
Actinodaphne	borneensis	Meisn.	Lauraceae	LC
Aglaia	exstipulata	(Griff.) W.Theob.	Meliaceae	LR/nt
Aglaia	sexipetala	Griff.	Meliaceae	LR/nt
Aglaia	simplicifolia	(Bedd.) Harms	Meliaceae	LR/nt
Aglaia	sp.		Meliaceae	LC
Agrostistachys	sessilifolia	(Kurz) Pax & K.Hoffm.	Euphorbiaceae	LC
Alangium	ridleyi	King	Cornaceae	LC
Amyxa	pluricornis	(Radlk.) Domke	Thymelaeaceae	LC
Anisophyllea	corneri	Ding Hou	Anisophylleaceae	LR/lc
Anisophyllea	disticha	(Jack) Baill.	Anisophylleaceae	LR/lc
Antidesma	leucopodum	Miq.	Euphorbiaceae	LC
Aporosa	lunata	(Miq.) Kurz	Phyllanthaceae	LC
Aporosa	octandra	(Buch.-Ham. ex D.Don) Vickery	Phyllanthaceae	LC
Aporosa	subcaudata	Merr.	Phyllanthaceae	LC
Ardisia	fuliginosa	Blume	Primulaceae	LC
Ardisia	sp.1		Primulaceae	LC
Artocarpus	dadah	Miq.	Moraceae	LC
Artocarpus	kemando	Miq.	Moraceae	LC
Artocarpus	odoratissimus	Blanco	Moraceae	LC
Atuna	racemosa	Raf.	Chrysobalanaceae	LC
Baccaurea	macrocarpa	(Miq.) Müll.Arg.	Phyllanthaceae	LC
Baccaurea	sumatrana	(Miq.) Müll.Arg.	Phyllanthaceae	LC
Barringtonia	macrostachya	(Jack) Kurz	Lecythidaceae	LC
Beilschmiedia	gemmiflora	(Blume) Kosterm.	Lauraceae	LC
Beilschmiedia	kunstleri	Gamble	Lauraceae	LC
Beilschmiedia	lucidula	(Miq.) Kosterm.	Lauraceae	LC
Beilschmiedia	pulverulenta	(Blume) Kosterm.	Lauraceae	LC
Beilschmiedia	rivularis	cf. rivularis Kosterm.	Lauraceae	LC
Beilschmiedia	sp.		Lauraceae	LC
Bhesa	paniculata	Arn.	Centroplacaceae	LR/lc
Blumeodendron	tokbrai	(Blume) Kurz	Euphorbiaceae	LC
Buchanania	sessilifolia	Blume	Anacardiaceae	LC
Calophyllum	canum	Hook.f. ex T.Anderson	Clusiaceae	LC
Calophyllum	inophyllum	L.	Clusiaceae	LR/lc
Calophyllum	lowei	Planch. & Triana	Clusiaceae	LC
Calophyllum	pulcherrimum	Wall. ex Choisy	Clusiaceae	LC
Canarium	littorale	Blume	Burseraceae	LR/lc
Canarium	sp.		Burseraceae	LC
Cephalomappa	malloticarpa	J.J.Sm.	Euphorbiaceae	LC
Cephalomappa	paludicola	Airy Shaw	Euphorbiaceae	LC
Chaetocarpus	castanocarpus	(Roxb.)	Peraceae	LC
Cleistanthus	sp.		Euphorbiaceae	LC
Cleistanthus	sumatranus	(Miq.) Müll.Arg.	Phyllanthaceae	LC
Cratoxylum	arborescens	(Vahl) Blume	Hypericaceae	LR/lc
Crudia	wrayi	Prain	Leguminosae	LC
Crypteronia	cumingii	(Planch.) Endl.	Penaeaceae	LC
Cryptocarya	lucida	Blume	Lauraceae	LC
Dacryodes	rugosa	(Blume) H.J.Lam	Burseraceae	LC
Dehaasia	caesia	Blume	Lauraceae	LC
Dialium	platysepalum	Baker	Leguminosae	LC
Diospyros	sp.1		Ebenaceae	LC
Dipterocarpus	crinitus	Dyer	Dipterocarpaceae	EN
Dipterocarpus	grandiflorus	(Blanco) Blanco	Dipterocarpaceae	CR
Dipterocarpus	sp.1		Dipterocarpaceae	LC
Dipterocarpus	tempehes	Slooten	Dipterocarpaceae	CR
Dipterocarpus	validus	Blume	Dipterocarpaceae	CR
Dracaena	angustifolia	(Medik.) Roxb.	Asparagaceae	LC
Drepananthus	biovulatus	(Boerl.) Survesw. & R.M.K.Saunders	Annonaceae	LC
Drepananthus	ramuliflorus	Maingay ex Hook.f. & Thomson	Annonaceae	LC
Drimycarpus	sp.		Anacardiaceae	LC
Drypetes	sp.		Putranjivaceae	LC
Durio	carinatus	Mast.	Malvaceae	LC
Dysoxylum	sp.		Meliaceae	LC
Elaeocarpus	floribundus	Blume	Elaeocarpaceae	LC
Elaeocarpus	mastersii	King	Elaeocarpaceae	LC
Elaeocarpus	petiolatus	(Jacq.) Wall.	Elaeocarpaceae	LC
Elaeocarpus	sp.		Elaeocarpaceae	LC
Erycibe	crassipes	Ridl. ex Hoogland	Convolvulaceae	LC
Ficus	recurva	var. pedicellata Corner	Moraceae	LC
Ficus	sundaica	Blume	Moraceae	LC
Garcinia	borneensis	Pierre	Clusiaceae	LC
Garcinia	havilandii	Stapf	Clusiaceae	LC
Garcinia	rigida	Miq.	Clusiaceae	LC
Garcinia	rostrata	(Hassk.) Miq.	Clusiaceae	LC
Garcinia	vidua	Ridl.	Clusiaceae	LC
Gironniera	nervosa	Planch.	Cannabaceae	LC
Gironniera	subaequalis	Planch.	Cannabaceae	LC
Gluta	wallichii	(Hook.f.) Ding Hou	Anacardiaceae	LC
Gomphia	serrata	(Gaertn.) Kanis	Ochnaceae	LR/lc
Goniothalamus	sp.		Annonaceae	LC
Gonocaryum	gracile	Miq.	Cardiopteridaceae	LC
Gonystylus	keithii	Airy Shaw	Thymelaeaceae	VU
Gymnacranthera	contracta	Warb.	Myristicaceae	LC
Gymnacranthera	forbesii	(King) Warb.	Myristicaceae	LC
Hancea	penangensis	(Müll.Arg.) S.E.C.Sierra, Kulju & Welzen	Euphorbiaceae	LC
Haplolobus	anisander	(Lauterb.) H.J.Lam	Burseraceae	LC
Hopea	dryobalanoides	Miq.	Dipterocarpaceae	LC
Hopea	dyeri	F.Heim	Dipterocarpaceae	LC
Hopea	myrtifolia	cf. myrtifolia Miq.	Dipterocarpaceae	LC
Hopea	sp.1		Dipterocarpaceae	LC
Horsfieldia	glabra	(Reinw. ex Blume) Warb.	Myristicaceae	LC
Hydnocarpus	castanea	Hook.f. & Thomson	Achariaceae	LC
Hydnocarpus	sp.		Achariaceae	LC
Hydnocarpus	sumatrana	Koord.	Achariaceae	LC
Hydnocarpus	woodii	Merr.	Achariaceae	LC
Knema	cinerea	var. sumatrana (Warb.)	Myristicaceae	LC
Knema	cinerea	Warb.	Myristicaceae	LC
Knema	furfuracea	(Hook. f. & Thomson) Warb.	Myristicaceae	LR/lc
Knema	galeata	J.Sinclair	Myristicaceae	LC
Knema	latifolia	Warb.	Myristicaceae	LR/lc
Knema	mandaharan	Warb.	Myristicaceae	LC
Knema	sp.1		Myristicaceae	LC
Lepisanthes	amoena	(Hassk.) Leenh.	Sapindaceae	LC
Lepisanthes	tetraphylla	Radlk.	Sapindaceae	LC
Lithocarpus	daphnoideus	(Blume) A.Camus	Fagaceae	LC
Lithocarpus	ewyckii	(Korth.) Rehder	Fagaceae	LC
Lithocarpus	gracilis	(Korth.) Soepadmo	Fagaceae	LC
Lithocarpus	sp.1		Fagaceae	LC
Litsea	firma	(Blume) Hook.f.	Lauraceae	LC
Litsea	lanceolata	(Blume) Kosterm.	Lauraceae	LC
Litsea	sessiliflora	Hook.f.	Lauraceae	LC
Lophopetalum	beccarianum	Pierre	Celastraceae	LC
Lophopetalum	sp.		Celastraceae	LC
Maasia	glauca	(Hassk.) Mols, Kessler & Rogstad	Annonaceae	LC
Macaranga	lowii	King ex Hook.f.	Euphorbiaceae	LC
Macaranga	recurvata	Gage	Euphorbiaceae	LC
Macaranga	triloba	(Thunb.) Müll.Arg.	Euphorbiaceae	LC
Madhuca	sp.1		Sapotaceae	LC
Mangifera	swintonioides	Kosterm.	Anacardiaceae	LC
Melanochyla	caesia	(Blume) Ding Hou	Anacardiaceae	LC
Melanochyla	fulvinervia	(Blume) Ding Hou	Anacardiaceae	LC
Melanochyla	sp.		Anacardiaceae	LC
Memecylon	kunstleri	King	Melastomataceae	VU
Memecylon	myrsinoides	Blume	Melastomataceae	LC
Mesua	elmeri	(Merr.) Kosterm.	Calophyllaceae	LC
Microcos	crassifolia	Burret	Malvaceae	LC
Microcos	sp.		Malvaceae	LC
Millettia	sp.		Leguminosae	LC
Myristica	iners	Blume	Myristicaceae	LR/lc
Nauclea	sp.		Rubiaceae	LC
Nephelium	cuspidatum	Blume	Sapindaceae	LC
Nephelium	lappaceum	L.	Sapindaceae	LR/lc
Nephelium	sp.		Sapindaceae	LC
Ochanostachys	amentacea	Mast.	Olacaceae	DD
Ormosia	sp.		Leguminosae	LC
Palaquium	dasyphyllum	Pierre ex Dubard	Sapotaceae	LC
Palaquium	quercifolium	(de Vriese) Burck	Sapotaceae	LC
Payena	leerii	(Teijsm. & Binn.) Kurz	Sapotaceae	LC
Payena	lucida	A.DC.	Sapotaceae	LC
Pentace	sp.		Malvaceae	LC
Phoebe	grandis	(Nees) Merr.	Lauraceae	LC
Porterandia	sp.		Rubiaceae	LC
Prunus	polystachya	(Hook.f.) Kalkman	Rosaceae	LR/lc
Pternandra	azurea	(DC.) Burkill	Melastomataceae	LC
Quercus	subsericea	A.Camus	Fagaceae	LC
Ryparosa	hullettii	King	Achariaceae	LC
Santiria	apiculata	A.W.Benn.	Burseraceae	LR/lc
Santiria	griffithii	Engl.	Burseraceae	LR/lc
Santiria	laevigata	Blume	Burseraceae	LR/lc
Santiria	mollissima	Ridl.	Burseraceae	LC
Santiria	oblongifolia	Blume	Burseraceae	LC
Santiria	pilosa	Engl.	Burseraceae	LC
Santiria	tomentosa	Blume	Burseraceae	LR/lc
Sarcotheca	griffithii	Hallier f.	Oxalidaceae	LC
Scaphium	macropodum	(Miq.) Beumée ex K.Heyne	Malvaceae	LR/lc
Shorea	beccariana	Burck	Dipterocarpaceae	LC
Shorea	bracteolata	Dyer	Dipterocarpaceae	EN
Shorea	brunnescens	P.S.Ashton	Dipterocarpaceae	EN
Shorea	dasyphylla	Foxw.	Dipterocarpaceae	EN
Shorea	faguetiana	F.Heim	Dipterocarpaceae	EN
Shorea	falcifera	Dyer ex Brandis	Dipterocarpaceae	EN
Shorea	gibbosa	Brandis	Dipterocarpaceae	CR
Shorea	macroptera	Dyer	Dipterocarpaceae	LC
Shorea	maxwelliana	King	Dipterocarpaceae	EN
Shorea	mujongensis	P.S.Ashton	Dipterocarpaceae	CR
Shorea	pachyphylla	Ridl. ex Symington	Dipterocarpaceae	CR
Shorea	parvifolia	Dyer	Dipterocarpaceae	LC
Shorea	peltata	Symington	Dipterocarpaceae	CR
Shorea	sagittata	P.S.Ashton	Dipterocarpaceae	CR
Shorea	seminis	Slooten	Dipterocarpaceae	CR
Shorea	sp.		Dipterocarpaceae	LC
Stemonurus	secundiflorus	Blume	Stemonuraceae	LC
Sterculia	oblongata	R.Br.	Malvaceae	LC
Sterculia	sp.		Malvaceae	LC
Strombosia	ceylanica	Gardner	Olacaceae	LC
Swintonia	schwenckii	Teijsm. & Binn. ex Hook.f.	Anacardiaceae	LC
Symplocos	crassipes	C.B.Clarke	Symplocaceae	LC
Syzygium	bankense	(Hassk.) Merr. & L.M.Perry	Myrtaceae	LC
Syzygium	caudatilimbum	(Merr.) Merr. & L.M.Perry	Myrtaceae	LC
Syzygium	cymosum	(Lam.) DC.	Myrtaceae	LC
Syzygium	garciniifolium	(King) Merr. & L.M.Perry	Myrtaceae	LC
Syzygium	grande	(Wight) Walp.	Myrtaceae	LC
Syzygium	leptostemon	(Korth.) Merr. & L.M.Perry	Myrtaceae	LC
Syzygium	lineatum	(DC.) Merr. & L.M.Perry	Myrtaceae	LC
Syzygium	pycnanthum	Merr. & L.M.Perry	Myrtaceae	LC
Syzygium	scortechinii	(King) Chantaran. & J.Parn.	Myrtaceae	LC
Syzygium	sp.1		Myrtaceae	LC
Syzygium	tawahense	(Korth.) Merr. & L.M.Perry	Myrtaceae	LC
Tabernaemontana	sphaerocarpa	Blume	Apocynaceae	LC
Teijsmanniodendron	bogoriense	Koord.	Lamiaceae	LC
Teijsmanniodendron	coriaceum	(C.B.Clarke) Kosterm.	Lamiaceae	LC
Trigonopleura	malayana	Hook.f.	Peraceae	LC
Tristaniopsis	whiteana	(Griff.) Peter G.Wilson & J.T.Waterh.	Myrtaceae	LC
Urophyllum	enneandrum	(Wight) Ridl.	Rubiaceae	LC
Vatica	chartacea	P.S.Ashton	Dipterocarpaceae	CR
Vatica	micrantha	Slooten	Dipterocarpaceae	LC
Vatica	sp.		Dipterocarpaceae	LC
Vatica	teysmanniana	Burck	Dipterocarpaceae	CR
Xanthophyllum	excelsum	Blume ex Miq.	Polygalaceae	LC
Xanthophyllum	flavescens	Roxb.	Polygalaceae	LC
Xanthophyllum	stipitatum	A.W.Benn.	Polygalaceae	LC
Xylopia	caudata	Hook.f. & Thomson	Annonaceae	LC
